# Supplementary material
Source: PubMed Central journal article supplement (PMC5121380)
Supplement: JCM.01648-16_zjm999095217so1.pdf [file JCM.01648-16_zjm999095217so1.pdf]

**TABLE S1.** Conventional MLST schemes used for *in silico* MLST.<sup>a</sup>

| Target                              | Sequence length |
|-------------------------------------|-----------------|
| <u><i>Citrobacter freundii</i></u>  |                 |
| arcA                                | 435             |
| aspC                                | 513             |
| clpX                                | 567             |
| dnaG                                | 444             |
| fadD                                | 483             |
| lysP                                | 477             |
| mdh                                 | 549             |
| <u><i>Enterobacter cloacae</i></u>  |                 |
| dnaA                                | 442             |
| fusA                                | 646             |
| gyrB                                | 434             |
| leuS                                | 578             |
| pyrG                                | 259             |
| rplB                                | 607             |
| rpoB                                | 545             |
| <u><i>Escherichia coli</i></u>      |                 |
| adk                                 | 536             |
| fumC                                | 469             |
| gyrB                                | 460             |
| icd                                 | 518             |
| mdh                                 | 452             |
| purA                                | 478             |
| recA                                | 510             |
| <u><i>Klebsiella oxytoca</i></u>    |                 |
| gapA                                | 450             |
| infB                                | 318             |
| mdh                                 | 477             |
| pgi                                 | 432             |
| phoE                                | 420             |
| rpoB                                | 501             |
| tonB                                | 405             |
| <u><i>Klebsiella pneumoniae</i></u> |                 |
| gapA                                | 450             |
| infB                                | 318             |
| mdh                                 | 477             |
| pgi                                 | 432             |
| phoE                                | 420             |
| rpoB                                | 501             |
| tonB                                | 414             |

MLST = multilocus sequence typing

a. MLST schemes were based on the publicly available PubMLST.org database ([www.pubmlst.org](http://www.pubmlst.org))

**TABLE S2.** Whole genome sequences used for developing genus-, genetic complex- and species-specific wgMLST schemes: public database accession numbers and assembly characteristics.

| Isolate                                                     | MLST <sup>a</sup>                       | BioSample    | Assembly name          | National Center for Biotechnology Information database |                 |                  |                 | WGS project | Instit. Pasteur MLST database | Identification number | Level of assembly           | Assembly characteristics |           |     |           |           |     |           |         |           |   |
|-------------------------------------------------------------|-----------------------------------------|--------------|------------------------|--------------------------------------------------------|-----------------|------------------|-----------------|-------------|-------------------------------|-----------------------|-----------------------------|--------------------------|-----------|-----|-----------|-----------|-----|-----------|---------|-----------|---|
|                                                             |                                         |              |                        | GenBank assembly                                       | RefSeq assembly | GenBank sequence | RefSeq sequence |             |                               |                       |                             | Sequence length          | Contigs   |     |           | Scaffolds |     |           | Gaps    |           |   |
|                                                             |                                         |              |                        |                                                        |                 |                  |                 |             |                               |                       | Total                       | Unmapped                 | Number    | N50 | L50       | Number    | N50 | L50       | Spanned | Unspanned |   |
| <b>Citrobacter spp.</b>                                     |                                         |              |                        |                                                        |                 |                  |                 |             |                               |                       |                             |                          |           |     |           |           |     |           |         |           |   |
| Citrobacter koseri ATCC BAA-895 <sup>b</sup>                | NA                                      | SAMN02003912 | ASM1804v1              | GCA_00011040.1                                         | GF_00011040.1   | CP008822.1       | NC_009792.1     | -           | -                             | -                     | Complete genome, chromosome | 4,720,402                | -         | -   | -         | -         | -   | -         | -       | -         | - |
| Citrobacter amalonitidis LB4                                | NA                                      | SAMN02226357 | ASM71105v1             | GCA_00073105.1                                         | GF_00073105.1   | -                | -               | JMK201      | -                             | -                     | Complete genome, chromosome | 5,273,145                | -         | 110 | 115,086   | 15        | -   | -         | -       | -         | - |
| Citrobacter farmetii GTC 1319                               | NA                                      | SAMN0018686  | ASM7473v1              | GCA_00076473.1                                         | GF_00076473.1   | -                | -               | BBM001      | -                             | -                     | Contig                      | 4,529,495                | -         | 31  | 240,203   | 9         | -   | -         | -       | -         | - |
| Citrobacter freundii ATCC 8000 + MTCC 1658                  | Unknown ST, minor mismatch <sup>c</sup> | SAMN04269678 | ASM31246v1             | GCA_00031246.1                                         | GF_00031246.1   | -                | -               | ANV01       | -                             | -                     | Contig                      | 5,001,265                | -         | 171 | 198,048   | 8         | -   | -         | -       | -         | - |
| Citrobacter freundii Salkoff 7851                           | Unknown ST, minor mismatch <sup>c</sup> | SAMN0082765  | ASM20876v1             | GCA_00082765.1                                         | GF_00082765.1   | -                | -               | CACD01      | -                             | -                     | Contig                      | 4,904,641                | 4,904,566 | 363 | 60,237    | 27        | 357 | 60,237    | 27      | 6         | 0 |
| Citrobacter freundii CFNH1                                  | Unknown ST, minor mismatch <sup>c</sup> | SAMN0211384  | ASM6485v1              | GCA_0006485.1                                          | GF_0006485.1    | CP007557.1       | NZ_CP007557.1   | -           | -                             | -                     | Complete genome, chromosome | 5,099,034                | -         | -   | -         | -         | -   | -         | -       | -         | - |
| Citrobacter freundii FDMARGOS_73                            | ST8                                     | SAMN0235425  | ASM78375v1             | GCA_00078375.1                                         | GF_00078375.1   | -                | -               | JTB01       | -                             | -                     | Contig                      | 5,451,137                | -         | 3   | 5,064,606 | 1         | -   | -         | -       | -         | - |
| Citrobacter freundii GTC 09479                              | Unknown ST, minor mismatch <sup>c</sup> | SAMN02469850 | Whole genome assembly  | GCA_00034232.1                                         | GF_00034232.1   | -                | -               | ADM501      | -                             | -                     | Contig                      | 4,899,578                | -         | 31  | 370,883   | 5         | -   | -         | -       | -         | - |
| Citrobacter freundii GTC 09629                              | Unknown ST, minor mismatch <sup>c</sup> | SAMN02469849 | Whole genome assembly  | GCA_00038155.1                                         | GF_00038155.1   | -                | -               | AQUE1       | -                             | -                     | Contig                      | 5,053,892                | -         | 79  | 240,358   | 8         | -   | -         | -       | -         | - |
| Citrobacter freundii NBRC 12681                             | Unknown ST, minor mismatch <sup>c</sup> | SAMN0018684  | ASM75973v1             | GCA_00075973.1                                         | GF_00075973.1   | -                | -               | BBM01       | -                             | -                     | Contig                      | 4,920,734                | -         | 48  | 288,133   | 7         | -   | -         | -       | -         | - |
| Citrobacter freundii RL51                                   | Unknown ST, minor mismatch <sup>c</sup> | SAMN02051916 | Citrobacter assembly   | GCA_00052816.1                                         | GF_00052816.1   | -                | -               | JKT01       | -                             | -                     | Contig                      | 4,937,688                | -         | 88  | 158,049   | 9         | -   | -         | -       | -         | - |
| Citrobacter ordellium KC168                                 | Unknown ST, minor mismatch <sup>c</sup> | SAMN0222524  | ASM7270v1              | GCA_0002270.1                                          | GF_0002270.1    | FN64302.1        | NC_013716.1     | -           | -                             | -                     | Complete genome, chromosome | 5,346,659                | -         | -   | -         | -         | -   | -         | -       | -         | - |
| Citrobacter sedlakii NBRC 10572Z                            | NA                                      | SAMN0018685  | ASM75983v1             | GCA_00075983.1                                         | GF_00075983.1   | -                | -               | BBM01       | -                             | -                     | Contig                      | 4,631,466                | -         | 30  | 290,667   | 5         | -   | -         | -       | -         | - |
| Citrobacter werkmanii NBRC 10572J                           | NA                                      | SAMN0018685  | ASM75975v1             | GCA_00075975.1                                         | GF_00075975.1   | -                | -               | BBM01       | -                             | -                     | Contig                      | 4,947,997                | -         | 30  | 427,597   | 5         | -   | -         | -       | -         | - |
| Citrobacter youngae ATCC 29220                              | NA                                      | SAMN02415922 | ASM15597v1             | GCA_00015597.1                                         | GF_00015597.1   | -                | -               | ABWL02      | -                             | -                     | Scaffold                    | 5,154,159                | 5,150,259 | 49  | 497,106   | 4         | 10  | 2,724,488 | 1       | 39        | 0 |
| <b>Enterobacteriaceae complex</b>                           |                                         |              |                        |                                                        |                 |                  |                 |             |                               |                       |                             |                          |           |     |           |           |     |           |         |           |   |
| Enterobacter cloacae subsp. cloacae ATCC 13047 <sup>b</sup> | ST1                                     | SAMN02003901 | ASM2556v1              | GCA_0002556.1                                          | GF_0002556.1    | CP001918.1       | NC_014121.1     | -           | -                             | -                     | Complete genome, chromosome | 5,314,581                | -         | -   | -         | -         | -   | -         | -       | -         | - |
| Enterobacter cloacae 34399                                  | ST114                                   | SAMN03067418 | ASM81422v1             | GCA_00081422.1                                         | GF_00081422.1   | CP010384.1       | NZ_CP010384.1   | -           | -                             | -                     | Complete genome, chromosome | 4,784,288                | -         | -   | -         | -         | -   | -         | -       | -         | - |
| Enterobacter cloacae 34977                                  | ST254                                   | SAMN03067414 | ASM81412v1             | GCA_00081412.1                                         | GF_00081412.1   | CP010376.1       | NZ_CP010376.1   | -           | -                             | -                     | Complete genome, chromosome | 5,150,493                | -         | -   | -         | -         | -   | -         | -       | -         | - |
| Enterobacter cloacae 35083                                  | ST259                                   | SAMN03067416 | ASM81420v1             | GCA_00081420.1                                         | GF_00081420.1   | CP010371.1       | NZ_CP010371.1   | -           | -                             | -                     | Complete genome, chromosome | 4,932,974                | -         | -   | -         | -         | -   | -         | -       | -         | - |
| Enterobacter cloacae ECNH2                                  | ST3                                     | SAMN0211382  | ASM72450v1             | GCA_00072450.1                                         | GF_00072450.1   | CP008823.1       | NZ_CP008823.1   | -           | -                             | -                     | Complete genome, chromosome | 4,852,800                | -         | -   | -         | -         | -   | -         | -       | -         | - |
| Enterobacter cloacae ECNH43                                 | ST97                                    | SAMN0211383  | ASM73022v1             | GCA_00073022.1                                         | GF_00073022.1   | CP008897.1       | NZ_CP008897.1   | -           | -                             | -                     | Complete genome, chromosome | 4,633,407                | -         | -   | -         | -         | -   | -         | -       | -         | - |
| Enterobacter cloacae ECNH4                                  | ST191                                   | SAMN0281150  | ASM78486v1             | GCA_00078486.1                                         | GF_00078486.1   | CP009850.1       | NZ_CP009850.1   | -           | -                             | -                     | Complete genome, chromosome | 4,761,385                | -         | -   | -         | -         | -   | -         | -       | -         | - |
| Enterobacter cloacae ECR901                                 | ST97                                    | SAMN0211384  | ASM73027v1             | GCA_00073027.1                                         | GF_00073027.1   | CP008905.1       | NZ_CP008905.1   | -           | -                             | -                     | Complete genome, chromosome | 4,621,385                | -         | -   | -         | -         | -   | -         | -       | -         | - |
| Enterobacter cloacae ECRW51                                 | ST2                                     | SAMN0204307  | ASM23997v1             | GCA_00023997.1                                         | GF_00023997.1   | CP02886.1        | NC_016814.1     | -           | -                             | -                     | Complete genome, chromosome | 4,734,438                | -         | -   | -         | -         | -   | -         | -       | -         | - |
| Enterobacter cloacae GGT036                                 | ST432                                   | SAMN03005138 | ASM77015v1             | GCA_00077015.1                                         | GF_00077015.1   | CP009756.1       | NZ_CP009756.1   | -           | -                             | -                     | Complete genome, chromosome | 4,848,754                | -         | -   | -         | -         | -   | -         | -       | -         | - |
| Enterobacter cloacae subsp. cloacae ENKHU01                 | ST3                                     | SAMN02003909 | ASM2627v1              | GCA_0002627.1                                          | GF_0002627.1    | CP00377.1        | NC_018406.1     | -           | -                             | -                     | Complete genome, chromosome | 4,726,562                | -         | -   | -         | -         | -   | -         | -       | -         | - |
| Enterobacter cloacae subsp. dissolvens SDM1                 | ST736                                   | SAMN02003921 | ASM2376v3              | GCA_0002376.3                                          | GF_0002376.3    | CP003678.1       | NC_019879.1     | -           | -                             | -                     | Complete genome, chromosome | 4,968,248                | -         | -   | -         | -         | -   | -         | -       | -         | - |
| <b>Escherichia spp.</b>                                     |                                         |              |                        |                                                        |                 |                  |                 |             |                               |                       |                             |                          |           |     |           |           |     |           |         |           |   |
| Escherichia coli D42 <sup>b</sup>                           | ST114                                   | SAMN0222727  | ASM2712v1              | GCA_0002712.1                                          | GF_0002712.1    | FN65476.1        | NC_017826.1     | -           | -                             | -                     | Complete genome, chromosome | 5,241,977                | -         | -   | -         | -         | -   | -         | -       | -         | - |
| Escherichia coli 536                                        | ST127                                   | SAMN02604181 | ASM1330v1              | GCA_0001330.1                                          | GF_0001330.1    | CP00047.1        | NC_008923.1     | -           | -                             | -                     | Complete genome, chromosome | 4,938,520                | -         | -   | -         | -         | -   | -         | -       | -         | - |
| Escherichia coli 568                                        | ST678                                   | SAMN0313829  | ASM2624v1              | GCA_0002624.1                                          | GF_0002624.1    | CU82145.2        | NC_011748.1     | -           | -                             | -                     | Complete genome, chromosome | 5,154,862                | -         | -   | -         | -         | -   | -         | -       | -         | - |
| Escherichia coli ABU 83972                                  | ST73                                    | SAMN02003928 | ASM14836v1             | GCA_00014836.1                                         | GF_00014836.1   | CP001671.1       | NC_017831.1     | -           | -                             | -                     | Complete genome, chromosome | 5,131,397                | -         | -   | -         | -         | -   | -         | -       | -         | - |
| Escherichia coli AFEC 01                                    | ST95                                    | SAMN02003424 | ASM1484v1              | GCA_0001484.1                                          | GF_0001484.1    | CP00468.1        | NC_008963.1     | -           | -                             | -                     | Complete genome, chromosome | 5,082,025                | -         | -   | -         | -         | -   | -         | -       | -         | - |
| Escherichia coli AFEC 078                                   | ST23                                    | SAMN02003426 | ASM33275v1             | GCA_00033275.1                                         | GF_00033275.1   | CP004009.1       | NC_020163.1     | -           | -                             | -                     | Complete genome, chromosome | 4,798,435                | -         | -   | -         | -         | -   | -         | -       | -         | - |
| Escherichia coli ATCC 8739                                  | ST3021                                  | SAMN02598405 | ASM1938v1              | GCA_0001938.1                                          | GF_0001938.1    | CP00046.1        | NC_010468.1     | -           | -                             | -                     | Complete genome, chromosome | 4,746,218                | -         | -   | -         | -         | -   | -         | -       | -         | - |
| Escherichia coli B REL-006                                  | ST93                                    | SAMN02003921 | ASM11798v1             | GCA_00011798.1                                         | GF_00011798.1   | CP000819.1       | NC_012967.1     | -           | -                             | -                     | Complete genome, chromosome | 4,629,812                | -         | -   | -         | -         | -   | -         | -       | -         | - |
| Escherichia coli RL21(D)C3                                  | ST93                                    | SAMN0222558  | ASM959v1               | GCA_0002258.1                                          | GF_0002258.1    | ABM4691.2        | NC_012832.2     | -           | -                             | -                     | Complete genome, chromosome | 4,556,947                | -         | -   | -         | -         | -   | -         | -       | -         | - |
| Escherichia coli RL21(D)E3                                  | ST93                                    | SAMN02003478 | ASM2269v1              | GCA_0002269.1                                          | GF_0002269.1    | CP01509.3        | NC_012971.2     | -           | -                             | -                     | Complete genome, chromosome | 4,565,953                | -         | -   | -         | -         | -   | -         | -       | -         | - |
| Escherichia coli BW2562                                     | ST10                                    | SAMN02003900 | ASM2324v1              | GCA_0002324.1                                          | GF_0002324.1    | CP001386.1       | NC_012799.1     | -           | -                             | -                     | Complete genome, chromosome | 4,578,159                | -         | -   | -         | -         | -   | -         | -       | -         | - |
| Escherichia coli CF1073                                     | ST73                                    | SAMN02004094 | ASM744v1               | GCA_0000744.1                                          | GF_0000744.1    | AE014075.1       | NC_004431.1     | -           | -                             | -                     | Complete genome, chromosome | 5,231,428                | -         | -   | -         | -         | -   | -         | -       | -         | - |
| Escherichia coli DH1                                        | ST1060                                  | SAMN02598470 | ASM2363v1              | GCA_0002363.1                                          | GF_0002363.1    | CP001637.1       | NC_017825.1     | -           | -                             | -                     | Complete genome, chromosome | 4,630,707                | -         | -   | -         | -         | -   | -         | -       | -         | - |
| Escherichia coli DH1                                        | ST1060                                  | -            | ASM27010v1             | GCA_00027010.1                                         | GF_00027010.1   | AP012030.1       | NC_017838.1     | -           | -                             | -                     | Complete genome, chromosome | 4,621,340                | -         | -   | -         | -         | -   | -         | -       | -         | - |
| Escherichia coli E2437A                                     | ST1132                                  | SAMN02004038 | ASM1774v1              | GCA_0001774.1                                          | GF_0001774.1    | CP008000.1       | NC_009801.1     | -           | -                             | -                     | Complete genome, chromosome | 4,979,619                | -         | -   | -         | -         | -   | -         | -       | -         | - |
| Escherichia coli ED1a                                       | ST452                                   | SAMN0313823  | ASM2620v1              | GCA_0002620.1                                          | GF_0002620.1    | CU82162.2        | NC_011745.1     | -           | -                             | -                     | Complete genome, chromosome | 5,209,948                | -         | -   | -         | -         | -   | -         | -       | -         | - |
| Escherichia coli ET11 H10407                                | ST48                                    | SAMN0222727  | ASM27047v1             | GCA_00027047.1                                         | GF_00027047.1   | FN64944.1        | NC_017833.1     | -           | -                             | -                     | Complete genome, chromosome | 5,153,435                | -         | -   | -         | -         | -   | -         | -       | -         | - |
| Escherichia coli H5                                         | ST46                                    | SAMN02003927 | ASM1676v1              | GCA_0001676.1                                          | GF_0001676.1    | CP008002.1       | NC_009803.1     | -           | -                             | -                     | Complete genome, chromosome | 4,643,638                | -         | -   | -         | -         | -   | -         | -       | -         | - |
| Escherichia coli IA1                                        | ST1128                                  | SAMN0313820  | ASM2626v1              | GCA_0002626.1                                          | GF_0002626.1    | CU82160.2        | NC_011741.1     | -           | -                             | -                     | Complete genome, chromosome | 4,700,560                | -         | -   | -         | -         | -   | -         | -       | -         | - |
| <b>Klebsiella oxytoca</b>                                   |                                         |              |                        |                                                        |                 |                  |                 |             |                               |                       |                             |                          |           |     |           |           |     |           |         |           |   |
| Klebsiella oxytoca KCTC 1680 <sup>b</sup>                   | ST28                                    | SAMN02003930 | ASM24032v1             | GCA_00024032.1                                         | GF_00024032.1   | CP003218.1       | NC_016812.2     | -           | -                             | -                     | Complete genome, chromosome | 5,974,109                | -         | -   | -         | -         | -   | -         | -       | -         | - |
| Klebsiella oxytoca 10-5248                                  | ST53                                    | SAMN02463997 | PE_Kho_oxyl_10-5248_V1 | GCA_00026958.1                                         | GF_00026958.1   | -                | -               | AKCF01      | -                             | -                     | Contig                      | 6,029,795                | -         | 4   | 5,848,092 | 1         | -   | -         | -       | -         | - |
| Klebsiella oxytoca 11492-1                                  | ST36                                    | SAMN02471877 | K011492-1_1.0          | GCA_00025915.1                                         | GF_00025915.1   | -                | -               | AIEM01      | -                             | -                     | Contig                      | 6,176,536                | -         | 213 | 106,308   | 20        | -   | -         | -       | -         | - |
| Klebsiella oxytoca E718                                     | ST27                                    | SAMN02003942 | ASM27670v2             | GCA_00027670.2                                         | GF_00027670.2   | CP003883.1       | NC_018106.1     | -           | -                             | -                     | Complete genome, chromosome | 6,097,032                | -         | -   | -         | -         | -   | -         | -       | -         | - |
| Klebsiella oxytoca FDMARGOS_86                              | Unknown ST, minor mismatch <sup>c</sup> | SAMN02003945 | ASM7389v1              | GCA_0007389.1                                          | GF_0007389.1    | -                | -               | JTB01       | -                             | -                     | Contig                      | 6,477,598                | -         | 5   | 6,071,363 | 1         | -   | -         | -       | -         | - |
| Klebsiella oxytoca H19                                      | ST62                                    | SAMN0222646  | ASM2450v1              | GCA_0002450.1                                          | GF_0002450.1    | -                | -               | ARM01       | -                             | -                     | Contig                      | 5,860,821                | -         | 88  | 192,319   | 10        | -   | -         | -       | -         | - |
| Klebsiella oxytoca HKCP_L1                                  | ST11                                    | SAMN02081440 | ASM36324               |                                                        |                 |                  |                 |             |                               |                       |                             |                          |           |     |           |           |     |           |         |           |   |

**TABLE S3.** Overview of target genes included in species-specific wgMLST- and cgMLST typing schemes<sup>a</sup>

| Microorganism                       | Name                                                         | Reference genome |           | Typing schemes        |                  |                                    |             |                  |              |              |                    |
|-------------------------------------|--------------------------------------------------------------|------------------|-----------|-----------------------|------------------|------------------------------------|-------------|------------------|--------------|--------------|--------------------|
|                                     |                                                              | Target genes     | Bases     | Target genes included |                  | Target genes excluded <sup>b</sup> |             | Bases included   |              | Date created | SeqSphere+ version |
|                                     |                                                              |                  |           | Core genome           | Accessory genome | Whole genome                       | Core genome | Accessory genome | Whole genome |              |                    |
| <i>Citrobacter</i> spp.             | <i>Citrobacter koseri</i> ATCC BAA-395                       | 4,978            | 4,720,462 | 182                   | 4,736            | 4,918                              | 133,300     | 4,121,455        | 4,254,795    | 2015.02.09   | 2.3.0              |
| <i>Enterobacter cloacae</i> complex | <i>Enterobacter cloacae</i> subsp. <i>cloacae</i> ATCC 13047 | 5,120            | 5,314,581 | 693                   | 4,260            | 4,953                              | 628,107     | 3,922,212        | 4,550,319    | 2015.03.10   | 2.3.0              |
| <i>Escherichia coli</i>             | <i>Escherichia coli</i> O42                                  | 4,793            | 5,241,977 | 2,764                 | 1,785            | 4,549                              | 2,735,270   | 1,615,200        | 4,350,470    | 2014.07.04   | 2.1.0              |
| <i>Klebsiella oxydoxa</i>           | <i>Klebsiella oxydoxa</i> KCTC 1686                          | 5,340            | 5,974,109 | 3,068                 | 2,200            | 5,268                              | 3,099,178   | 2,016,620        | 5,115,798    | 2015.04.08   | 2.3.1              |
| <i>Klebsiella pneumoniae</i>        | <i>Klebsiella pneumoniae</i> NTUH-K2044                      | 4,992            | 5,246,520 | 2,294                 | 2,641            | 4,925                              | 2,163,674   | 2,465,615        | 4,692,289    | 2014.07.18   | 2.1.0              |

cgMLST = core genome multilocus sequence typing; wgMLST = whole genome multilocus sequence typing

a. cgMLST schemes included only the core genome targets; wgMLST schemes included all whole genome targets

b. Based on reference genome filters

**TABLE S4.** Summary of assembly characteristics of 1,827 ESBL-E isolates.<sup>a</sup>

| Parameter                                      | Mean        | Median      | Minimum    | Maximum       |
|------------------------------------------------|-------------|-------------|------------|---------------|
| <b>Reads</b>                                   |             |             |            |               |
| Number, <i>n</i>                               | 2,500,805   | 2,451,808   | 530,780    | 9,760,870     |
| Number matched, <i>n</i>                       | 2,212,150   | 2,203,775   | 519,703    | 7,884,490     |
| Number non-matched, <i>n</i>                   | 288,655     | 83,092      | 7,385      | 1,876,380     |
| Percentage reads used, %                       | 90.8%       | 96.2%       | 61.5%      | 99.2%         |
| Mean length (base count), <i>n</i>             | 142         | 149         | 92         | 243           |
| Mean length matched (base count), <i>n</i>     | 144         | 152         | 93         | 247           |
| Mean length non-matched (base count), <i>n</i> | 86          | 92          | 11         | 180           |
| Total base count, <i>n</i>                     | 325,313,458 | 307,929,108 | 94,871,782 | 1,073,062,634 |
| Total base count matched, <i>n</i>             | 298,988,597 | 271,970,730 | 94,013,404 | 1,061,919,732 |
| Total base count non-matched, <i>n</i>         | 26,324,861  | 5,039,174   | 661,973    | 177,356,775   |
| <b>Scaffolds</b>                               |             |             |            |               |
| Number, <i>n</i>                               | 125         | 115         | 23         | 644           |
| Mean length (mean base count), <i>n</i>        | 48,892      | 44,631      | 8,763      | 200,940       |
| N50 (base count), <i>n</i>                     | 163,804     | 147,658     | 16,990     | 997,471       |
| Minimum length (base count), <i>n</i>          | 530         | 513         | 500        | 933           |
| Maximum length (base count), <i>n</i>          | 433,762     | 388,849     | 76,938     | 2,146,409     |
| Consensus base count, <i>n</i>                 | 5,160,832   | 5,135,666   | 3,746,759  | 6,657,910     |
| <b>Coverage</b>                                |             |             |            |               |
| Coverage (mean depth), <i>n</i>                | 63          | 60          | 20         | 224           |
| Coverage matched, <i>n</i>                     | 58          | 53          | 19         | 221           |
| Breadth-of-coverage (% of expected size), %    |             |             |            |               |
| Minimum reference genome size <sup>b</sup>     | 111%        | 111%        | 98%        | 125%          |
| Maximum reference genome size <sup>b</sup>     | 97%         | 97%         | 87%        | 113%          |

ESBL-E = extended-spectrum beta-lactamase-producing *Enterobacteriaceae*; N50 = largest scaffold length *N*, such that 50% of the assembled genome size is contained in scaffolds with a length of at least *N*; wgMLST = whole genome multilocus sequence typing

a. Including *n*=8 isolates that were sequenced in duplicate.

b. Species-specific minimum and maximum reference genome sizes were based on the assembled genomes used to create species-specific wgMLST schemes (see Table S2).

**TABLE S5.** Presence of core genome, accessory genome and whole genome target genes for 1,798 ESBL-E isolates.

|                                                      | Core genome targets |      | Accessory genome targets |      | Whole genome targets |      |
|------------------------------------------------------|---------------------|------|--------------------------|------|----------------------|------|
|                                                      | n                   | %    | n                        | %    | n                    | %    |
| <u><i>Citrobacter</i> spp. (n = 41)</u>              |                     |      |                          |      |                      |      |
| Mean                                                 | 178                 | 97.9 | 264                      | 5.6  | 442                  | 9.0  |
| Median                                               | 179                 | 98.4 | 164                      | 3.5  | 342                  | 7.0  |
| Minimum                                              | 169                 | 92.9 | 153                      | 3.2  | 326                  | 6.6  |
| Maximum                                              | 180                 | 98.9 | 4,284                    | 90.5 | 4,463                | 90.8 |
| <u><i>Enterobacter cloacae</i> complex (n = 121)</u> |                     |      |                          |      |                      |      |
| Mean                                                 | 679                 | 98.0 | 450                      | 10.6 | 1,129                | 22.8 |
| Median                                               | 681                 | 98.3 | 406                      | 9.5  | 1,088                | 22.0 |
| Minimum                                              | 651                 | 93.9 | 337                      | 7.9  | 1,008                | 20.4 |
| Maximum                                              | 689                 | 99.4 | 890                      | 20.9 | 1,567                | 31.6 |
| <u><i>Escherichia coli</i> (n = 1,351)</u>           |                     |      |                          |      |                      |      |
| Mean                                                 | 2,728               | 98.7 | 856                      | 48.0 | 3,584                | 78.8 |
| Median                                               | 2,733               | 98.9 | 817                      | 45.8 | 3,547                | 78.0 |
| Minimum                                              | 2,504               | 90.6 | 646                      | 36.2 | 3,321                | 73.0 |
| Maximum                                              | 2,755               | 99.7 | 1,232                    | 69.0 | 3,970                | 87.3 |
| <u><i>Klebsiella oxytoca</i> (n = 18)</u>            |                     |      |                          |      |                      |      |
| Mean                                                 | 3,020               | 98.4 | 1,409                    | 64.0 | 4,429                | 84.1 |
| Median                                               | 3,023               | 98.5 | 1,516                    | 68.9 | 4,535                | 86.1 |
| Minimum                                              | 2,963               | 96.6 | 513                      | 23.3 | 3,539                | 67.2 |
| Maximum                                              | 3,059               | 99.7 | 1,874                    | 85.2 | 4,916                | 93.3 |
| <u><i>Klebsiella pneumoniae</i> (n = 267)</u>        |                     |      |                          |      |                      |      |
| Mean                                                 | 2,259               | 98.9 | 2,134                    | 80.8 | 4,393                | 89.2 |
| Median                                               | 2,265               | 99.2 | 2,165                    | 82.0 | 4,430                | 89.9 |
| Minimum                                              | 2,139               | 93.7 | 1,588                    | 60.1 | 3,837                | 77.9 |
| Maximum                                              | 2,282               | 99.9 | 2,285                    | 86.5 | 4,551                | 92.4 |

ESBL-E = extended-spectrum beta-lactamase-producing *Enterobacteriaceae*

**TABLE S6.** Summary statistics of the distributions of genetic distance for 950,275 pairwise comparisons of ESBL-E isolates: core genome, accessory genome and whole genome

|                                     | Pairwise comparisons | Number of alleles compared |                 |       | Number of different alleles |                      |                 | Proportion of different alleles (= genetic distance) |  |
|-------------------------------------|----------------------|----------------------------|-----------------|-------|-----------------------------|----------------------|-----------------|------------------------------------------------------|--|
|                                     |                      | n                          | Median          | Range | Median                      | Range                | Median          | Range                                                |  |
| <u>Core genome</u>                  |                      |                            |                 |       |                             |                      |                 |                                                      |  |
| <i>Citrobacter</i> spp.             | 820                  | 177                        | [164 - 180]     | 109   | [0 - 177]                   | 0.609 <sup>a,d</sup> | [0.000 - 0.994] |                                                      |  |
| <i>Enterobacter cloacae</i> complex | 7,260                | 674                        | [629 - 688]     | 598   | [0 - 672]                   | 0.892 <sup>a,d</sup> | [0.000 - 0.987] |                                                      |  |
| <i>Escherichia coli</i>             | 906,531              | 2,705                      | [2,325 - 2,755] | 2,593 | [0 - 2,684]                 | 0.964 <sup>a,d</sup> | [0.000 - 0.985] |                                                      |  |
| <i>Klebsiella oxytoca</i>           | 153                  | 2,984                      | [2,899 - 3,044] | 2,893 | [2 - 3,004]                 | 0.965 <sup>a,d</sup> | [0.001 - 0.996] |                                                      |  |
| <i>Klebsiella pneumoniae</i>        | 35,511               | 2,245                      | [2,027 - 2,281] | 1,895 | [0 - 2,232]                 | 0.844 <sup>a,d</sup> | [0.000 - 0.998] |                                                      |  |
| <u>Accessory genome</u>             |                      |                            |                 |       |                             |                      |                 |                                                      |  |
| <i>Citrobacter</i> spp.             | 820                  | 146                        | [74 - 173]      | 106   | [0 - 171]                   | 0.748 <sup>b,d</sup> | [0.000 - 1.000] |                                                      |  |
| <i>Enterobacter cloacae</i> complex | 7,260                | 311                        | [220 - 886]     | 277   | [0 - 687]                   | 0.943 <sup>b,d</sup> | [0.000 - 1.000] |                                                      |  |
| <i>Escherichia coli</i>             | 906,531              | 660                        | [432 - 1,206]   | 594   | [0 - 922]                   | 0.969 <sup>b,d</sup> | [0.000 - 0.998] |                                                      |  |
| <i>Klebsiella oxytoca</i>           | 153                  | 1,387                      | [344 - 1,800]   | 1,062 | [0 - 1,604]                 | 0.995 <sup>b,d</sup> | [0.000 - 1.000] |                                                      |  |
| <i>Klebsiella pneumoniae</i>        | 35,511               | 2,044                      | [1,335 - 2,244] | 1,820 | [0 - 1,962]                 | 0.899 <sup>b,d</sup> | [0.000 - 0.997] |                                                      |  |
| <u>Whole genome</u>                 |                      |                            |                 |       |                             |                      |                 |                                                      |  |
| <i>Citrobacter</i> spp.             | 820                  | 325                        | [246 - 348]     | 215   | [0 - 343]                   | 0.659 <sup>c</sup>   | [0.000 - 0.997] |                                                      |  |
| <i>Enterobacter cloacae</i> complex | 7,260                | 984                        | [872 - 1,561]   | 884   | [0 - 1,314]                 | 0.911 <sup>c</sup>   | [0.000 - 0.989] |                                                      |  |
| <i>Escherichia coli</i>             | 906,531              | 3,359                      | [2,922 - 3,938] | 3,175 | [0 - 3,538]                 | 0.966 <sup>c</sup>   | [0.000 - 0.986] |                                                      |  |
| <i>Klebsiella oxytoca</i>           | 153                  | 4,341                      | [3,276 - 4,813] | 3,905 | [2 - 4,399]                 | 0.974 <sup>c</sup>   | [0.000 - 0.996] |                                                      |  |
| <i>Klebsiella pneumoniae</i>        | 35,511               | 4,288                      | [3,489 - 4,520] | 3,727 | [0 - 3,938]                 | 0.870 <sup>c</sup>   | [0.000 - 0.997] |                                                      |  |

ESBL-E = extended-spectrum beta-lactamase-producing *Enterobacteriaceae*

- a. Difference in median genetic distance between species, core genome: Kruskal-Wallis Chi-square: 22,685; p<0.0005  
b. Difference in median genetic distance between species, accessory genome: Kruskal-Wallis Chi-square: 15,980; p<0.0005  
c. Difference in median genetic distance between species, whole genome: Kruskal-Wallis Chi-square: 20,867; p<0.0005  
d. Difference in median genetic distance between core and accessory genome: Sign test p<0.0005

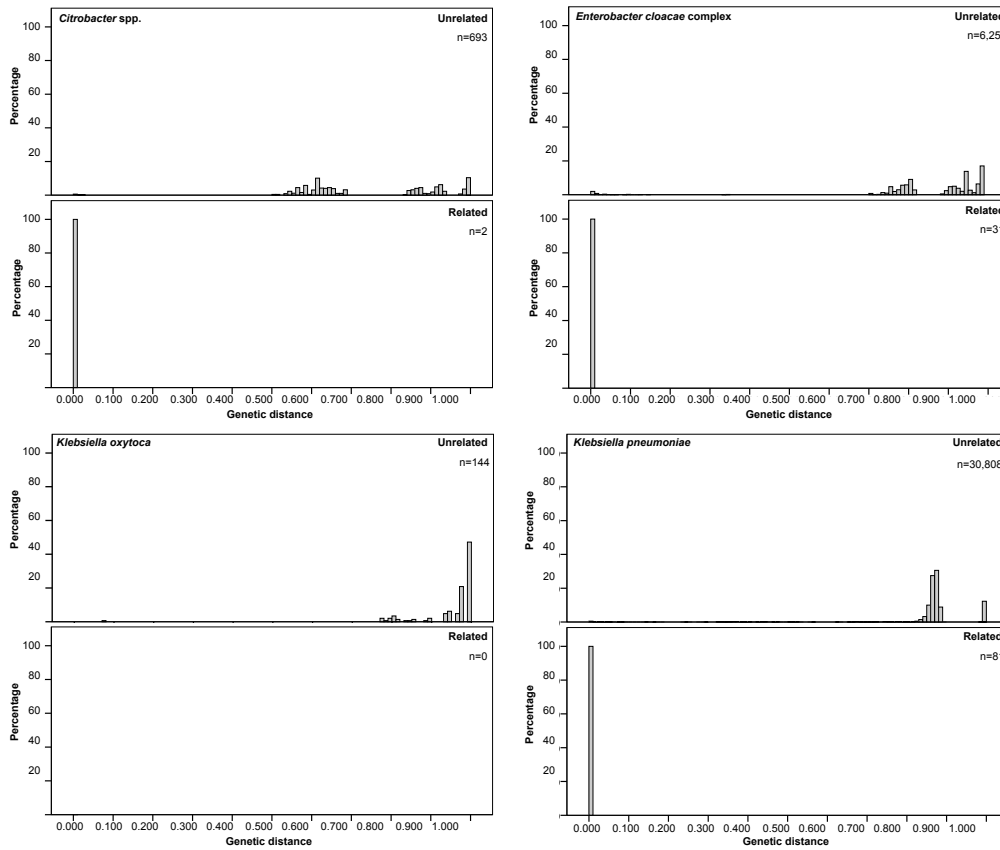

**FIGURE S1.** Distribution of whole genome multilocus sequence typing (wgMLST)-based genetic distance for pairwise comparisons of epidemiologically related and unrelated extended-spectrum beta-lactamase (ESBL)-producing *Citrobacter* spp., *Enterobacter cloacae* complex, *Klebsiella oxytoca*, and *Klebsiella pneumoniae* isolates. Epidemiologically related isolates were defined as being obtained from the same patient, belonging to the same sequence type (ST), and cultured within a time window of 30 days. Epidemiologically unrelated isolates were defined as being obtained from patients without a known epidemiological link. The strain collection did not include a pair of epidemiologically related ESBL-producing *Klebsiella oxytoca* isolates.
